# Supplementary material for: Rose Bengal incorporated in mesostructured silica nanoparticles: structural characterization, theoretical modeling and singlet oxygen delivery
Source: Royal Society of Chemistry journal article supplement (doi:10.1039/c5cp03564c), 2015-01-01
Supplement: c5cp03564c1.pdf [file c5cp03564c1.pdf]

## Supplementary Information

**Table S1** - Weight loss (%) due to the organic content calculated from TGA analysis between 150°C and 900°C after the removal of physisorbed water.

| Samples               | wt% at 150°C | wt% at 900°C | * $\Delta$ wt% | ** $\Delta$ wt% due RB |
|-----------------------|--------------|--------------|----------------|------------------------|
| Calcined MSNs         | 95.86        | 93.30        | 2.56           | -                      |
| NH <sub>2</sub> -MSNs | 94.81        | 81.91        | 12.90          | -                      |
| RB-MSNs 1%            | 95.47        | 78.91        | 16.56          | 1.1                    |
| RB-MSNs 4%            | 93.05        | 73.51        | 19.54          | 4.08                   |
| RB-MSNs 10%           | 92.95        | 69.93        | 23.02          | 7.56                   |

\* $\Delta$ wt% of calcined MSNs is only due to Si-OH condensation because no organic moieties are present, while in the case of NH<sub>2</sub>-MSNs and RB-MSNs, the  $\Delta$ wt% is due to -(CH<sub>2</sub>)<sub>2</sub>-NH<sub>2</sub> groups and RB molecules.

\*\* $\Delta$ wt% due RB has been calculated by subtracting from the total  $\Delta$ wt% (column 4) the  $\Delta$ wt% due Si-OH condensation (2.56) and due to -(CH<sub>2</sub>)<sub>2</sub>-NH<sub>2</sub> groups (12.90).

**Table S2** – Average particle size dimension obtained by DLS.

| Sample    | MSNs   | NH <sub>2</sub> -MSNs | RB-MSNs 1% | RB-MSNs 4% | RB-MSNs 10% |
|-----------|--------|-----------------------|------------|------------|-------------|
| Size (nm) | 159±32 | 150±30                | 174±34     | 184±37     | 155±31      |

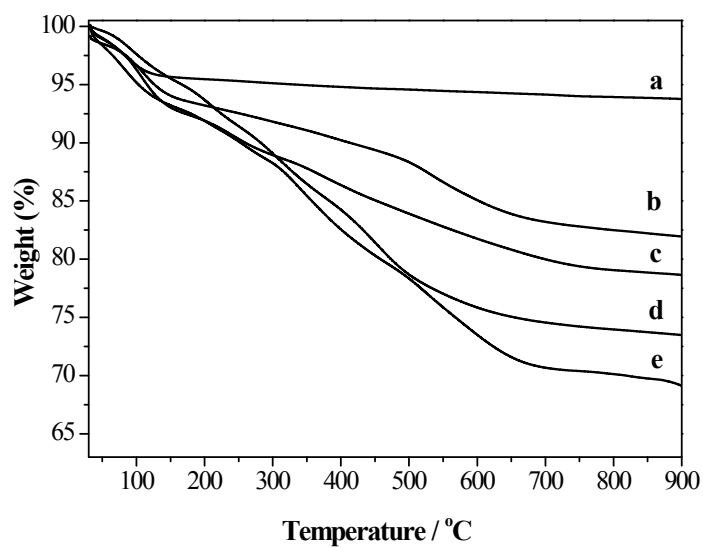

**Fig. S1** – TGA curves of calcined MSNs (curve a), NH<sub>2</sub>-MSNs (curve b), RB-MSNs 1% (curve c), 4% (curve d) and 10% (curve e).

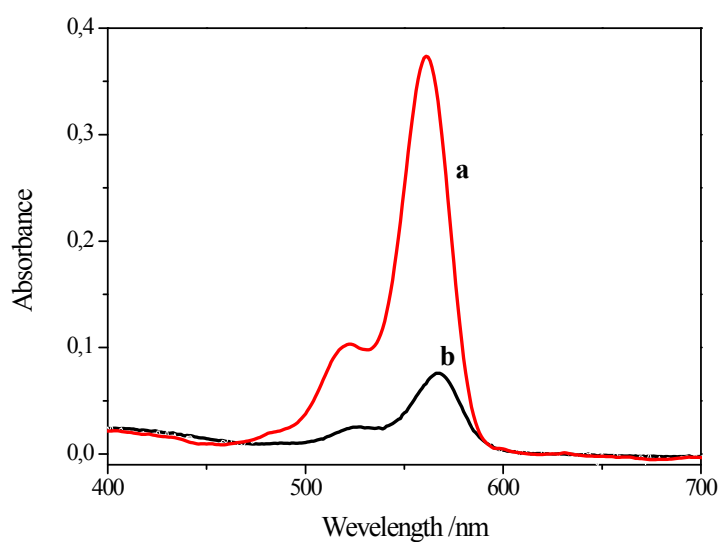

**Fig. S2**- UV-Vis spectra of RB-MSNs 1% eluates after washing the RB-MSNs 1% solid samples prepared by physical adsorption of RB (curve a) and by covalent bond of RB (curve b) to the MSNs nanoparticles.

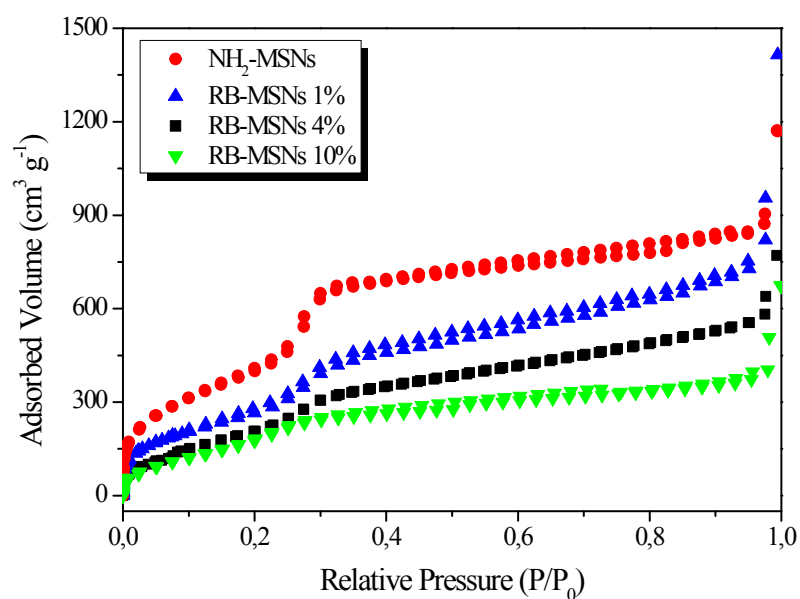

**Fig. S3** - N<sub>2</sub> adsorption-desorption isotherms at 77K of NH<sub>2</sub>-MSNs, RB-MSNs 1%, 4% and 10%.

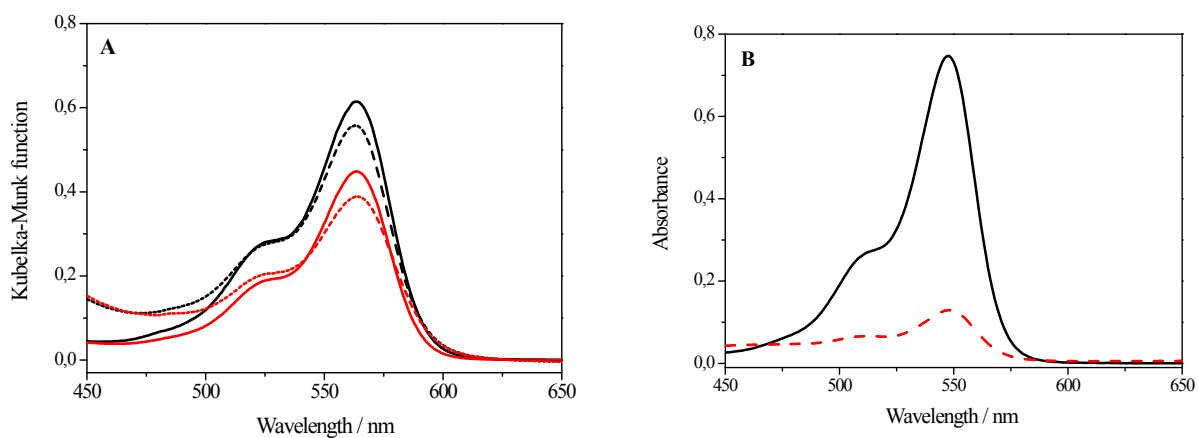

**Fig.S4** – Section A: DR UV-Vis spectra of RB-MSNs 4% (curve black) and 10% (curve red) after the synthesis (solid lines) and after exposing the solids to the visible light for 100 days (dashed lines). Section B: UV-Vis spectra of RB in water solution (black curve) and after exposing the solution to the visible light for 7 days (red curve).

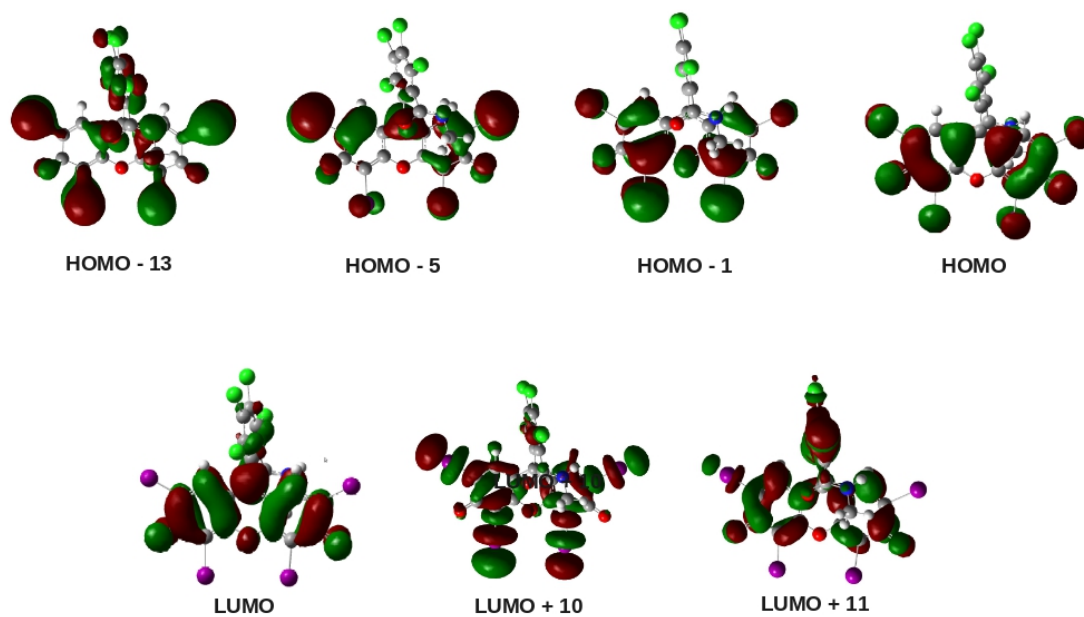

**Fig.**

S5 -Orbitals involved in the visible and UV main peak transitions.

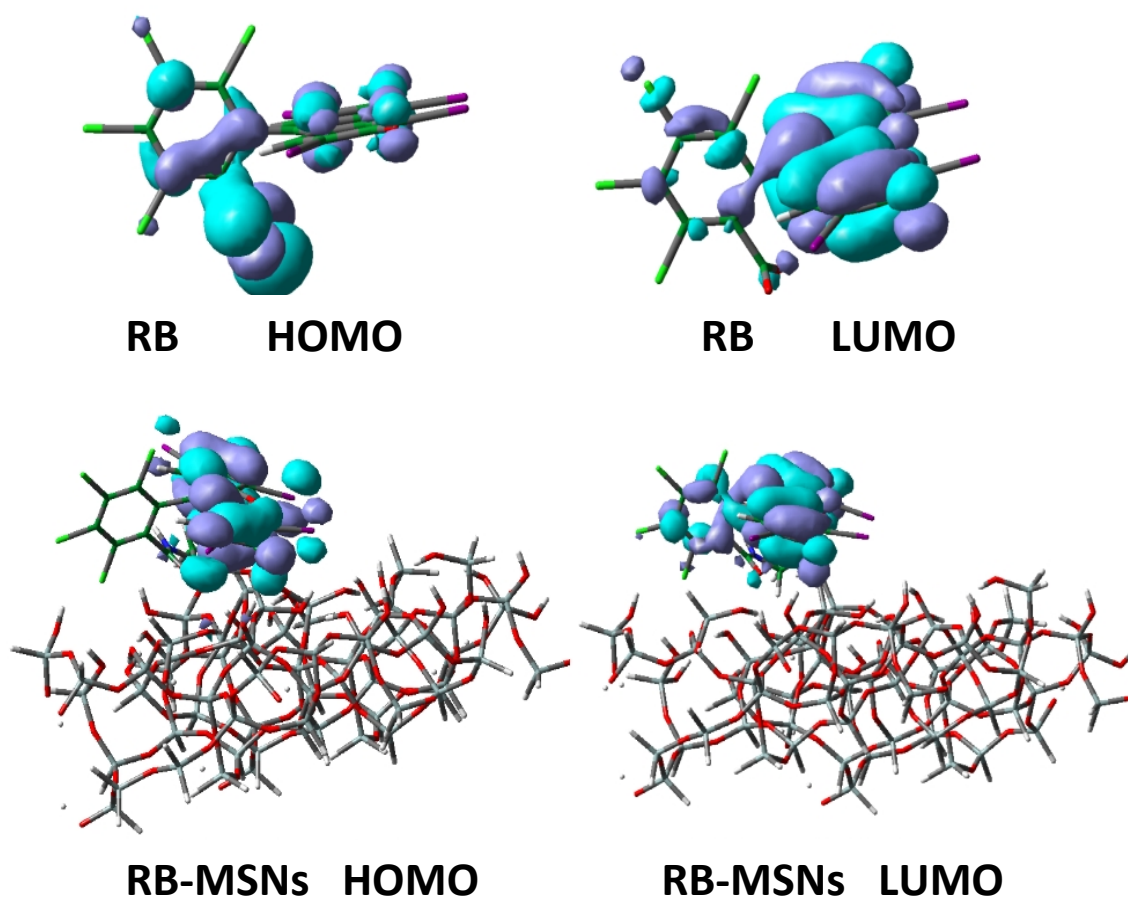

**Fig. S6** –HOMO and LUMO of free RB and of RB in MSNs nanoparticles.

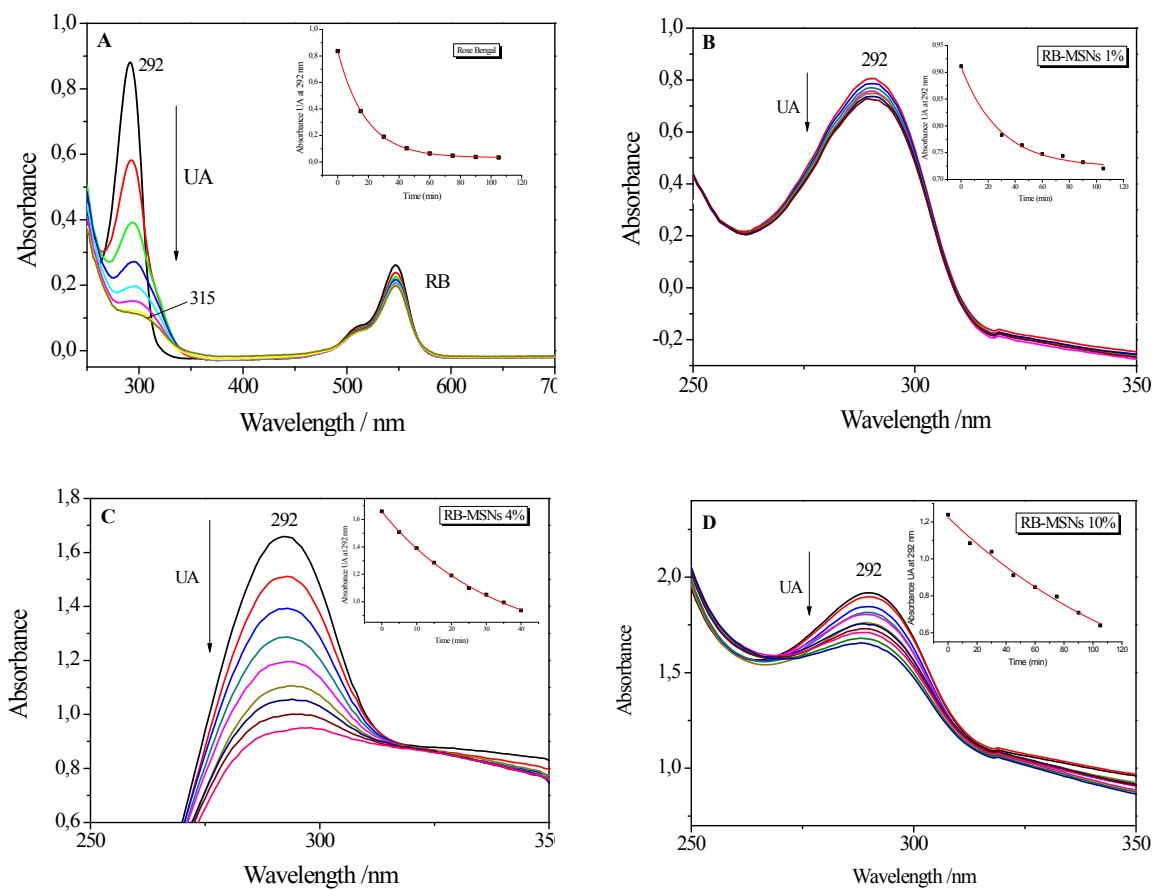

**Fig. S7** - Absorption spectra of UA in the presence of A) Rose Bengal; B) RB-MSNs 1%; C) RB-MSNs 4% and D) RB-MSNs 10% in water after different irradiation times with 540 nm light. Inset: decay curves for the absorption of UA as a function of irradiation time.
